# Supplementary material for: Electron dynamics in MoS2-graphite heterostructures
Source: Royal Society of Chemistry journal article supplement (doi:10.1039/c7nr04763k), 2017-01-01
Supplement: c7nr04763k1.pdf [file c7nr04763k1.pdf]

## Electron Dynamics in MoS<sub>2</sub>-Graphite Heterostructures

### Electronic Supplementary Information

Xinwu Zhang, Dawei He, Lixin Yi, Siqi Zhao, Jiaqi He, Yongsheng Wang, and Hui Zhao

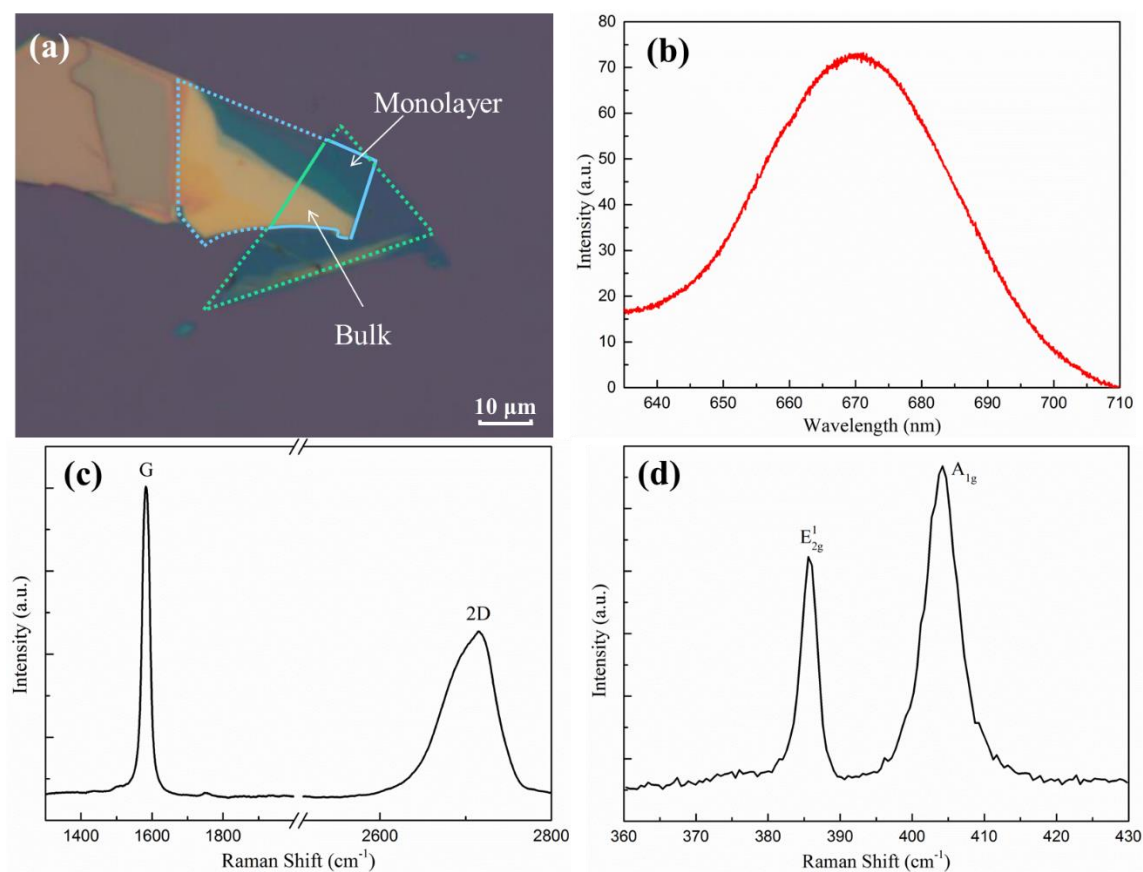

Figure S1: (a) Microscope image of the sample containing both heterostructures to be studied. (b) Photoluminescence spectrum of monolayer MoS<sub>2</sub>. (c) Raman spectrum of the multilayer graphite flake. (d) Raman spectrum of the monolayer MoS<sub>2</sub> flake.

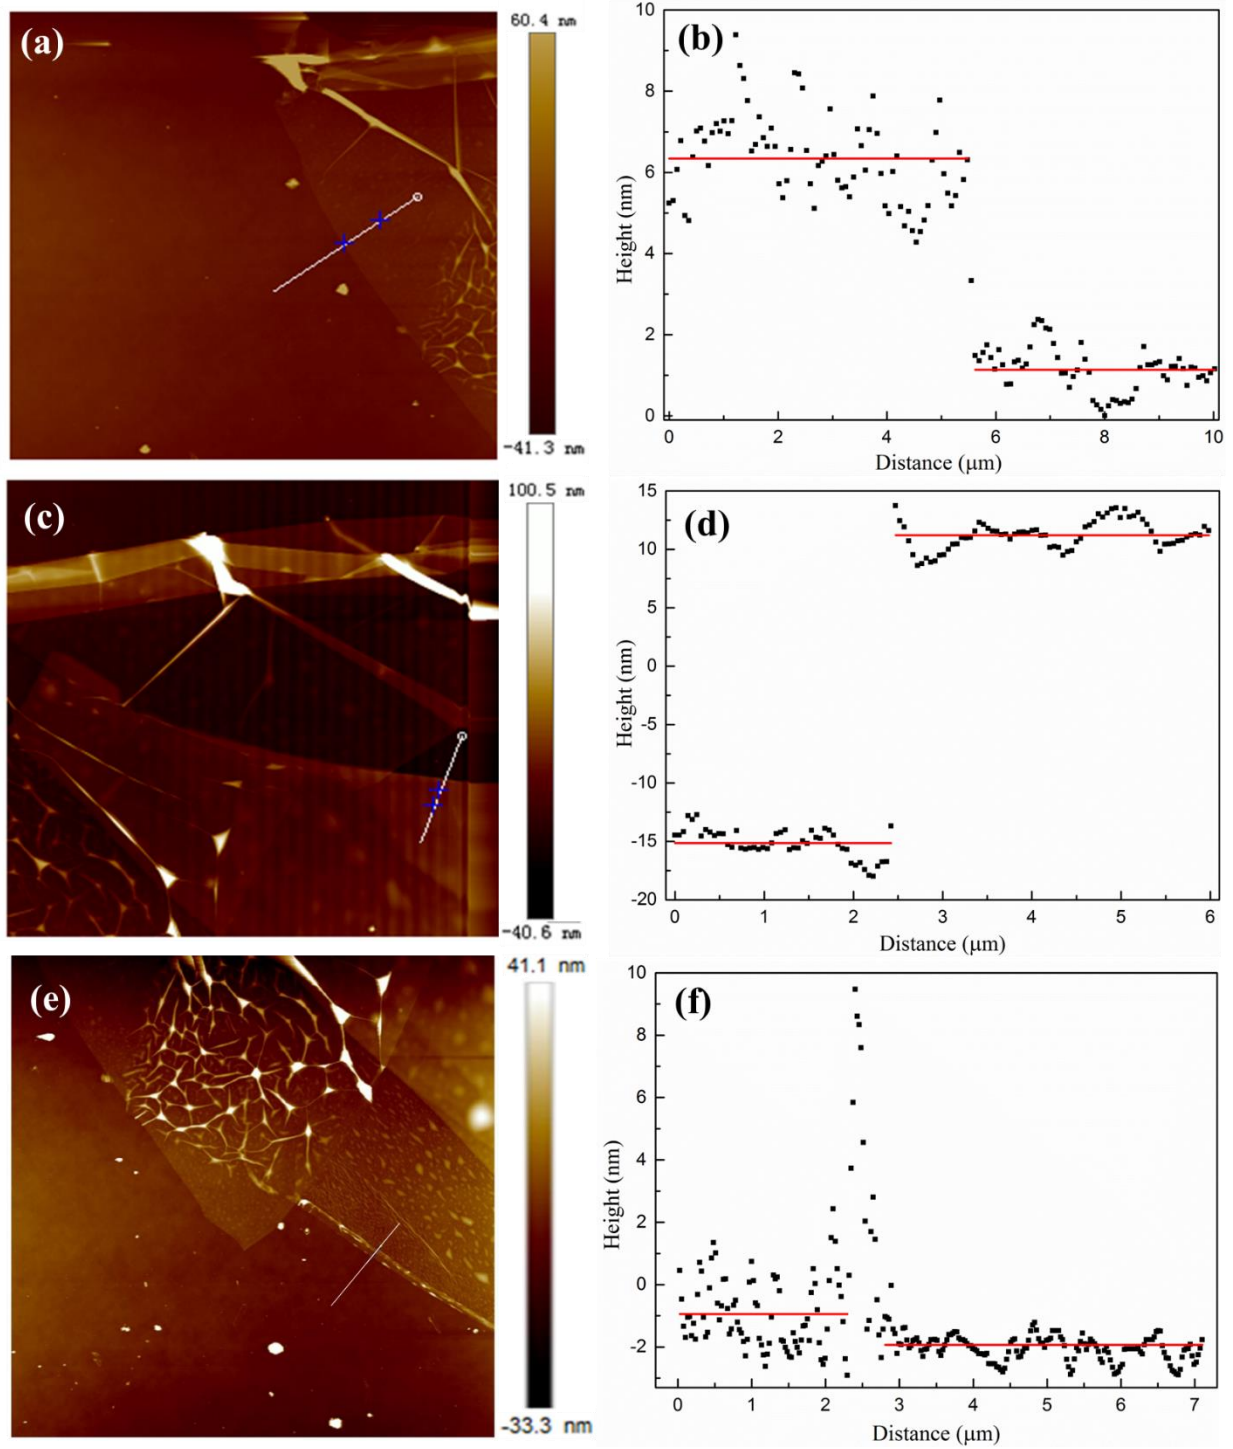

Figure S2: Atomic force microscope images of multilayer graphite (a), bulk-like  $\text{MoS}_2$  (c), and monolayer  $\text{MoS}_2$  (e) flakes. (b), (d), and (f) are line scans from the white line shown in (a), (c), and (e), respectively.

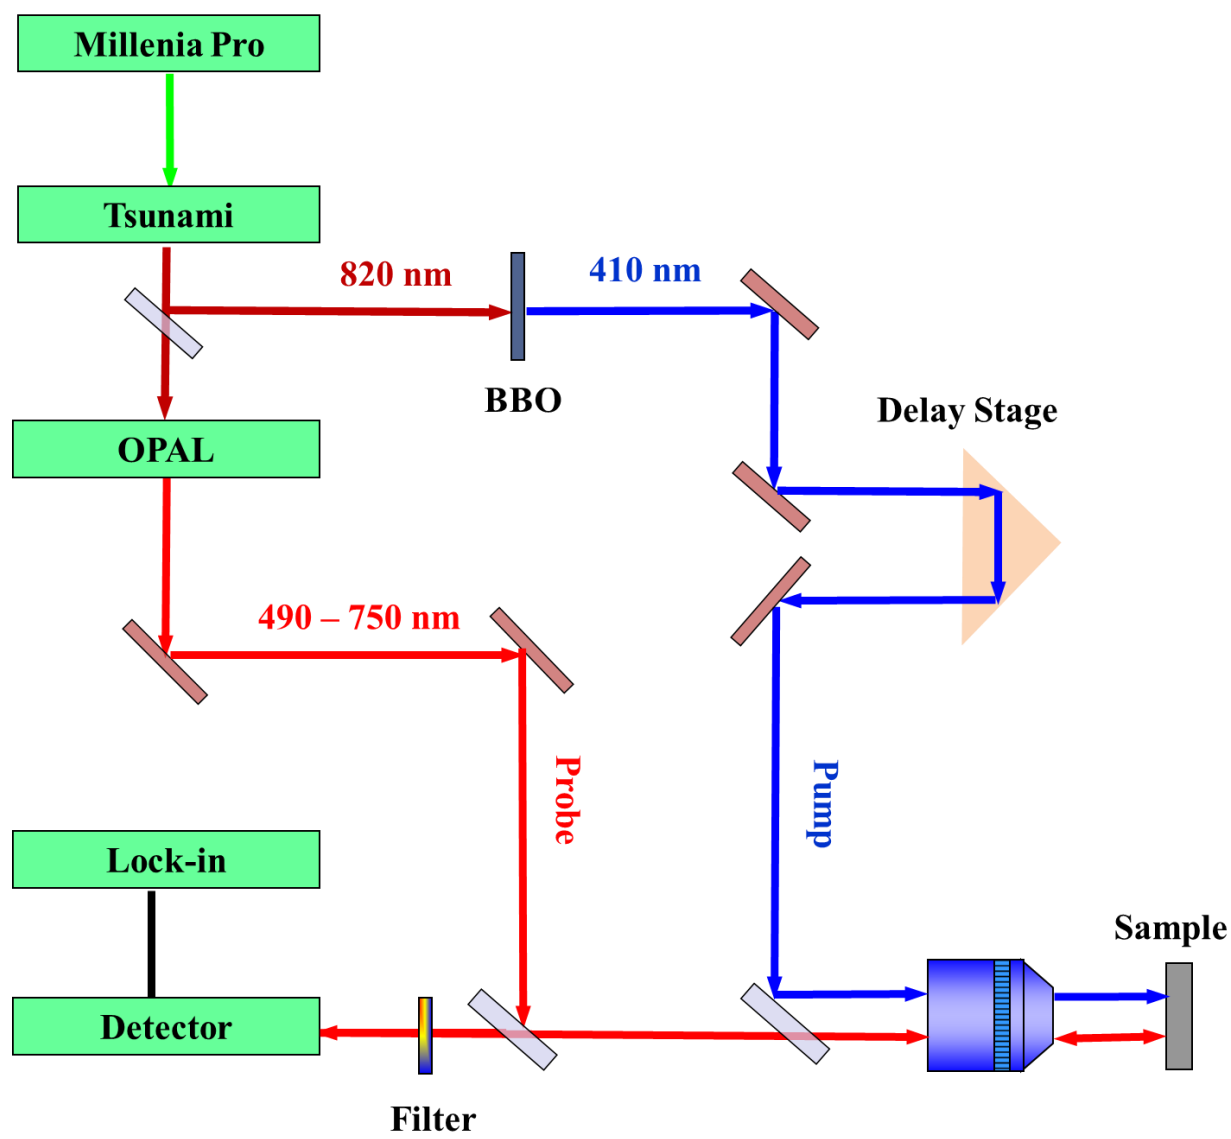

Figure S3: Schematics of the differential reflection setup.
